# Supplementary material for: Cross-lineage protection by human antibodies binding the influenza B hemagglutinin
Source: PubMed Central journal article supplement (PMC6338745; doi:10.1038/s41467-018-08165-y), 2019-01-18
Supplement: 41467_2018_8165_MOESM1_ESM.pdf [file 41467_2018_8165_MOESM1_ESM.pdf]

*Supplementary Information for:*

**Cross-lineage protection by human antibodies  
binding the influenza B hemagglutinin**

Liu et al.

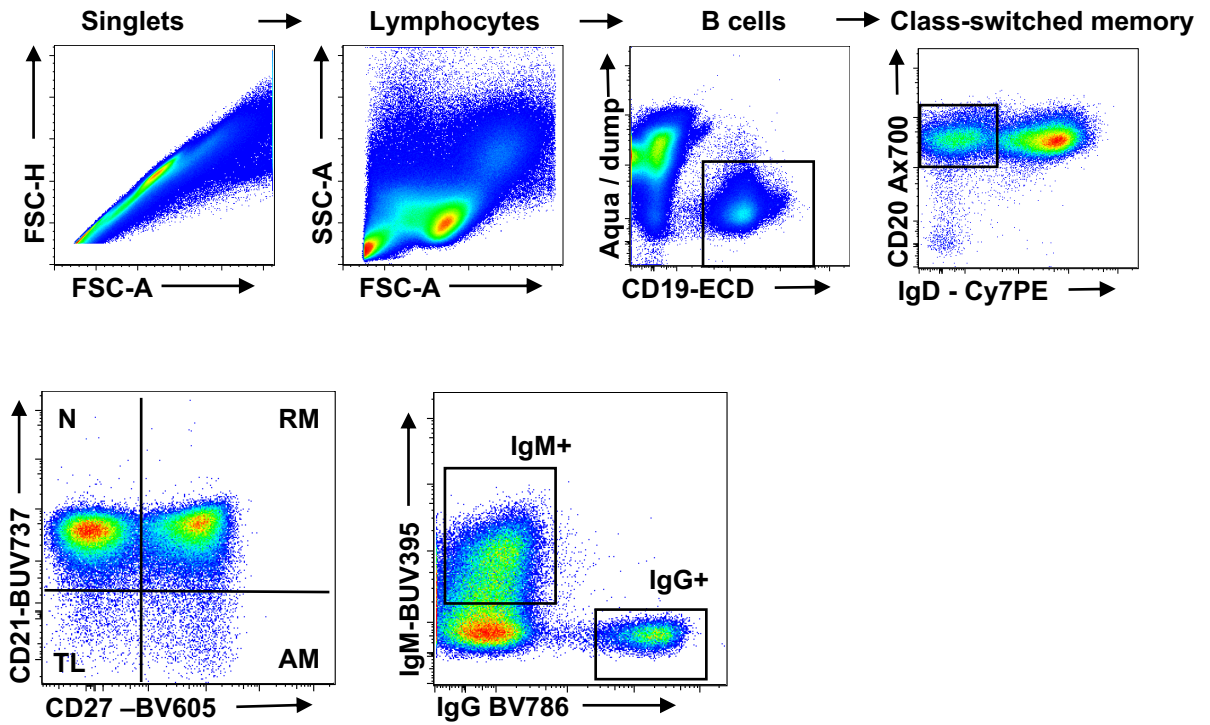

### Supplementary Figure 1 - Representative flow cytometry gating

Single live CD19<sup>+</sup> B lymphocytes were stained with IgD and CD20 to define class-switched B cells. Activation phenotype was assessed using surface markers CD21 and CD27. CD27<sup>-</sup>CD21<sup>+</sup> naïve (N), CD27<sup>+</sup>CD21<sup>+</sup> resting memory (RM), CD27<sup>+</sup>CD21<sup>-</sup> activated memory (AM) and CD27<sup>-</sup>CD21<sup>-</sup> tissue-like populations (TL) are denoted. Surface immunoglobulin expression was determined by co-staining for IgG and IgM subclasses. This gating was used for Figure 1 and 2.

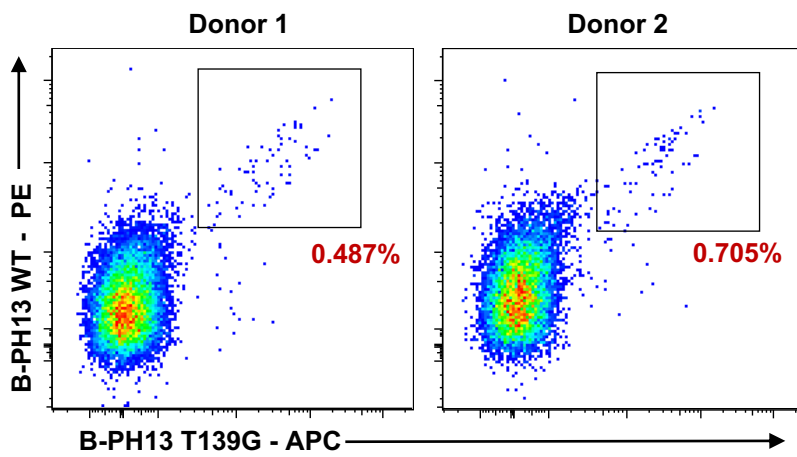

**Supplementary Figure 2 - Co-staining memory B cells with wild-type (WT) and T139G recombinant HA probes from B/Phuket/3073/2013**

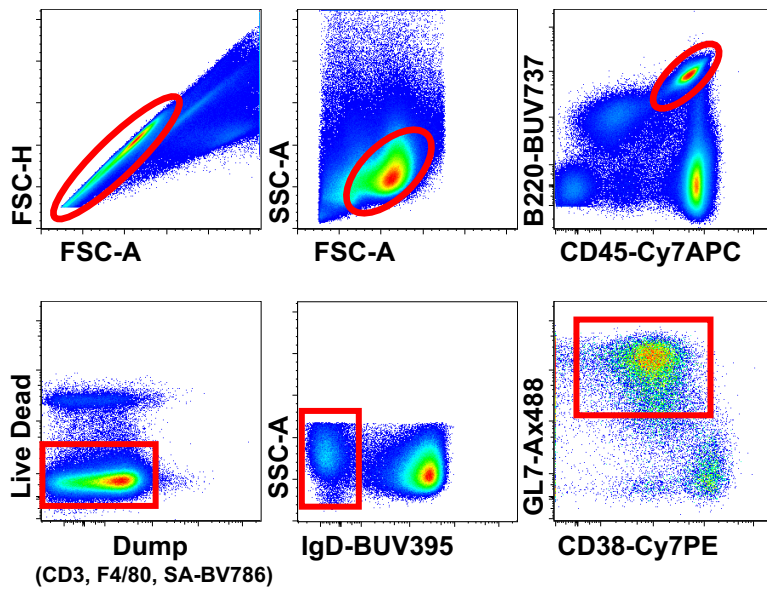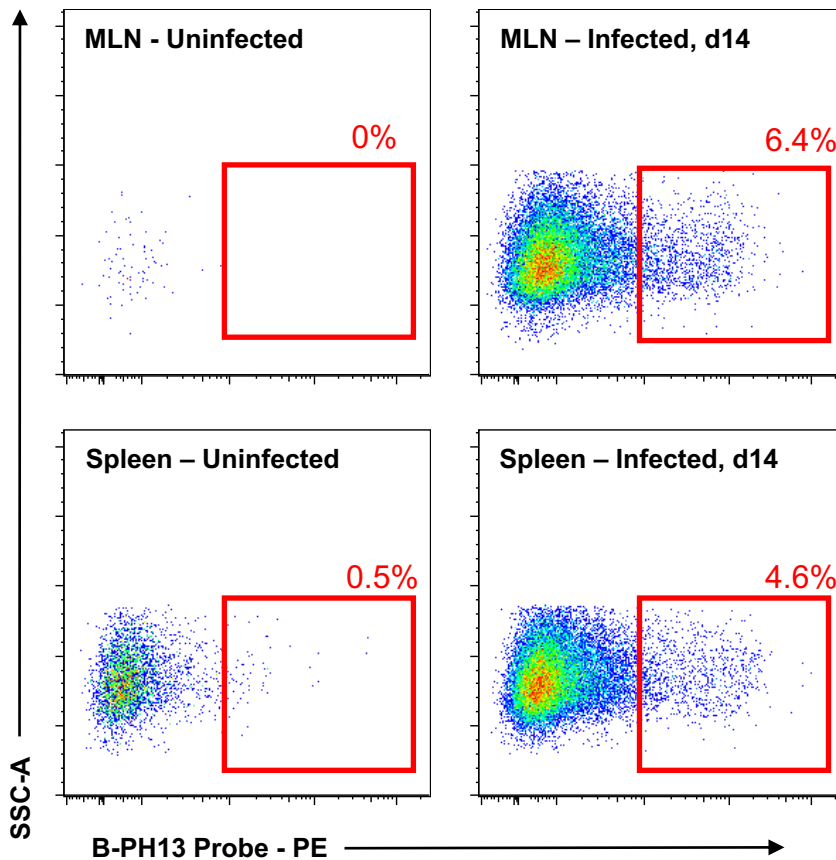

**Supplementary Figure 3 – Ability of IBV HA probes to resolve HA-specific B cells was confirmed in infected mice.** HA-specificity could be readily identified within germinal centre B cells isolated from the spleen or mediastinal lymph node of C57BL/6 mice infected intranasally with  $10^4$  TCID<sub>50</sub> B/Phuket/3073/2013.

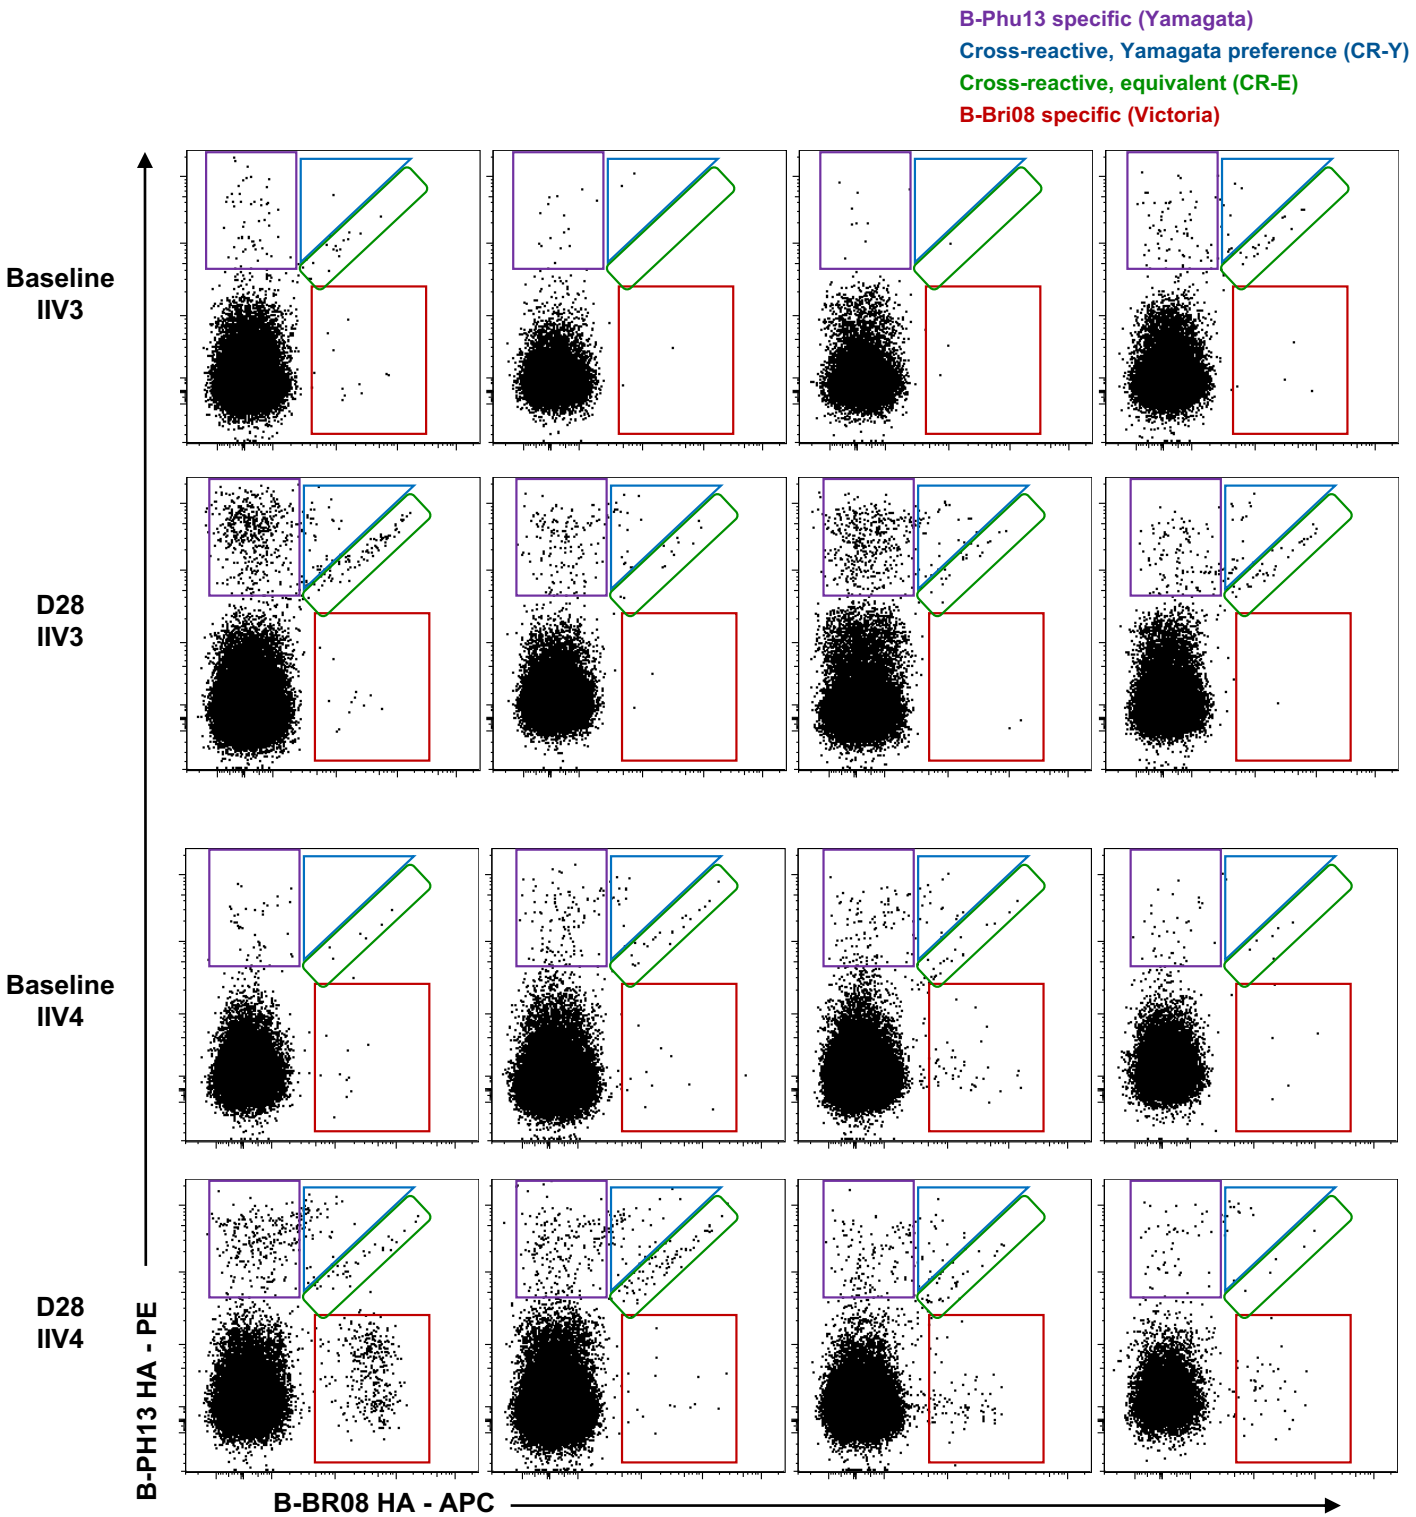

**Supplementary Figure 4 - Changes in lineage-specific and cross-reactive B cell populations in a cross-section of 4 subjects receiving IIV3 and 4 subjects receiving IIV4**

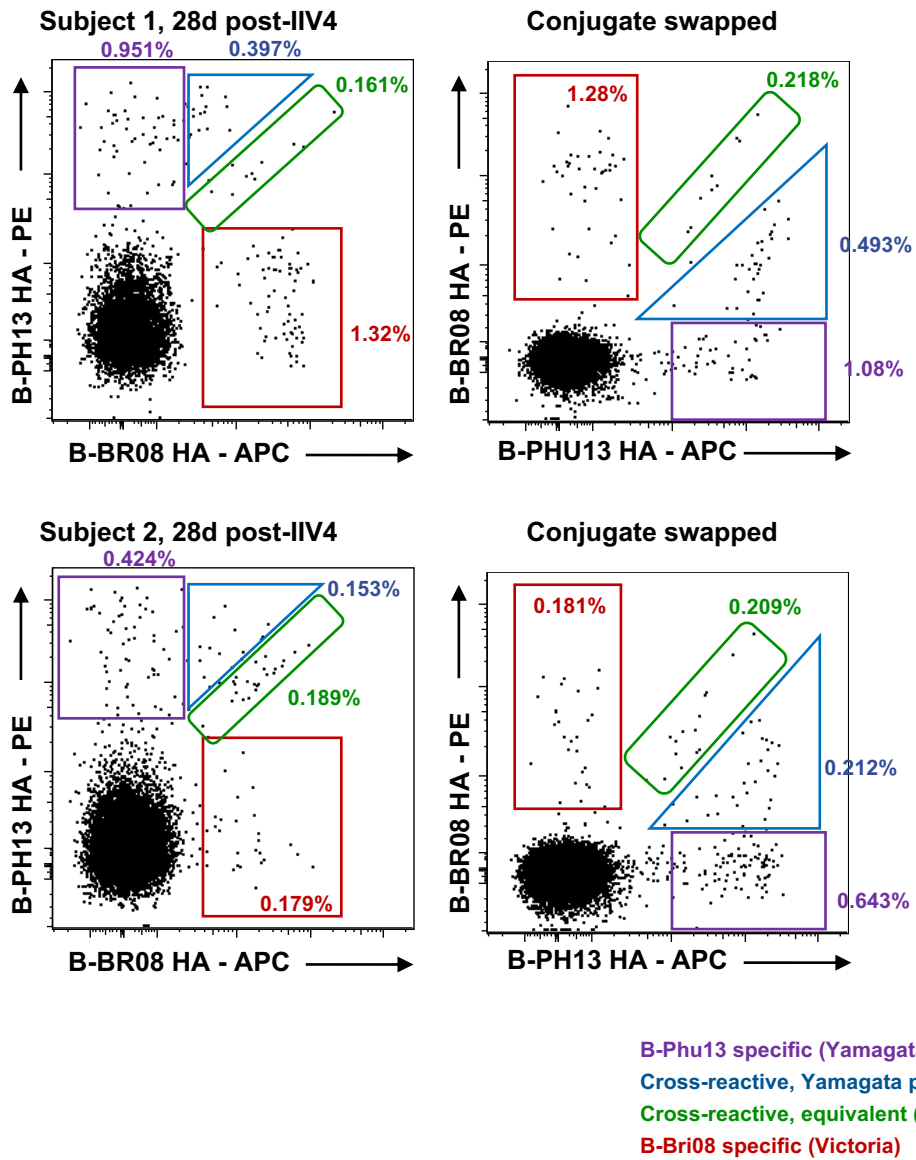

Supplementary Figure 5 - Distinct patterns of B-PH13 and B-BR08 cross-reactivity were confirmed using matched samples stained with swapped streptavidin conjugates.

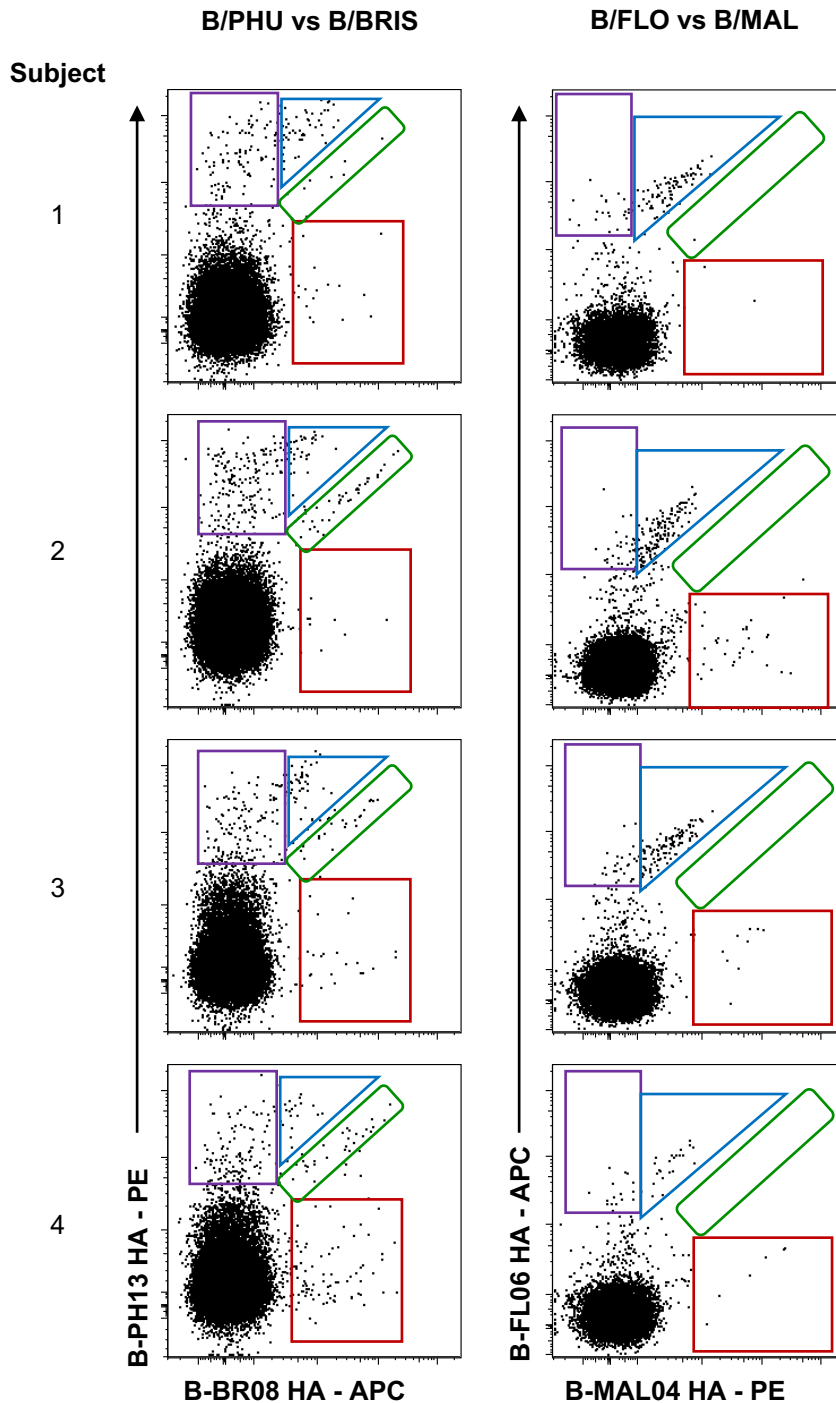

**Supplementary Figure 6. B/Florida and B/Malaysia cross-reactive B cell populations in four representative subjects receiving IIV4**

Cross-reactive staining patterns in cryopreserved PBMC samples from four subjects taken 4 weeks post-IIV4 immunisation were assessed using recombinant HA probes derived from B/Florida/4/2006 and B/Malaysia/2506/04. Shown in comparison to samples previously stained with B/BRIS and B/PHU probes.

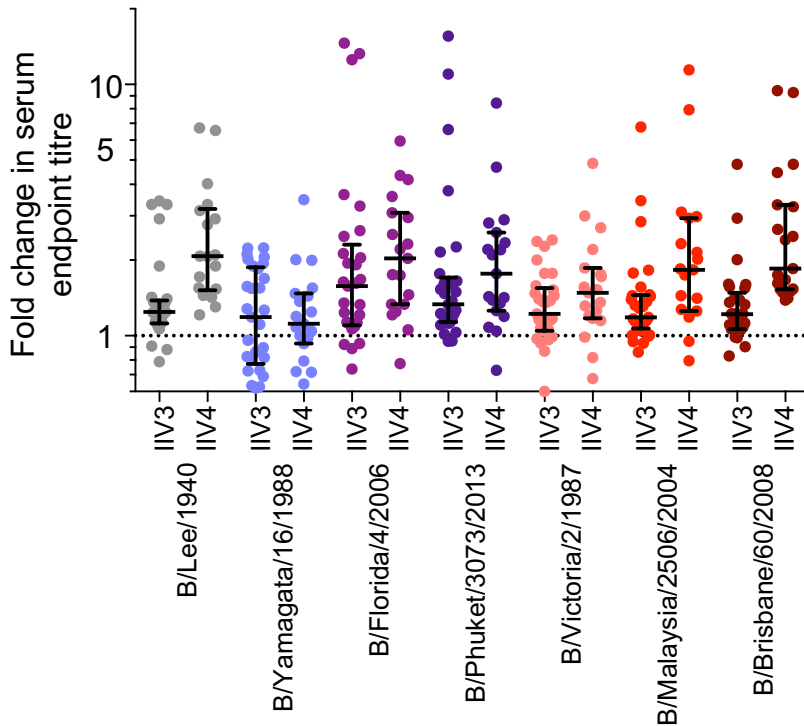

**Supplementary Figure 7 – IBV HA-specific serum antibody responses following immunisation with seasonal influenza vaccines**

The fold change in serum endpoint titres of antibody binding the indicated IBV strains following IIV3 and IIV4 immunisation was determined by ELISA. Median and IQR are indicated.



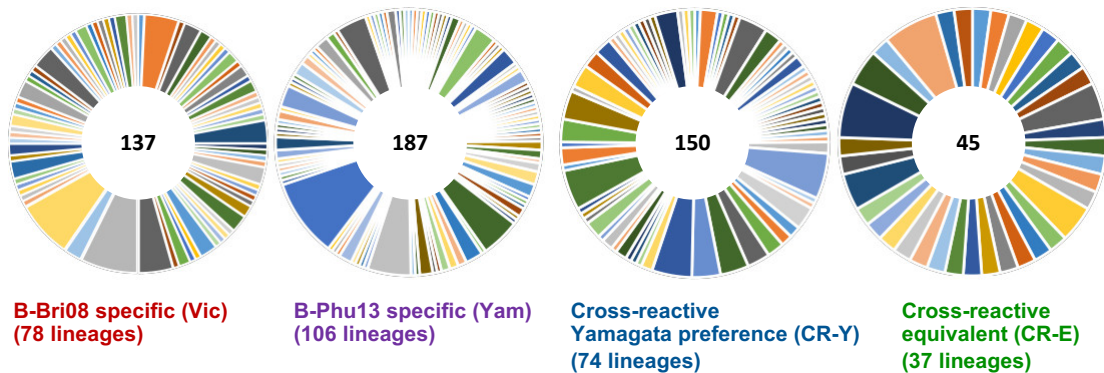

### Supplementary Figure 8 – Clonal Distribution of recovered BCR transcripts

BCR sequences recovered from each sorted population were clustered into families based upon similarities in germline gene utilization, light chain pairings and the length and sequence of the CDR-H3. The clonal distribution of each population is shown using color coded lineages, the width proportional to the number of clones in each family and the total number of BCR recovered in each population indicated in the middle.



**A**

B/Phuket/3073/2013 stem construct

MKAIIVLLMVVTSNADRICTGITSSNSPHVVKTATQGEVNVTVGIPLG**SSGL**KLANGTKYRP**QRETR**RGFFGAIAGFLEGGWEGMIA  
 GWHGYTSHGAHGVAVAADLKSTQEAINKITKNLNSLSELE**GSGGSGTDLA**ELAVLLSNEGIINSEDEHLLALERKLLKMLGPSAV  
 DIGNGCFETKHKCNQTCLDRIAAGTFNAGEFSLPTFDSLNI**TGSGYIPEAPRDGQAYVRKDGEWLLSTFLGSLNDIFEAQKIE**  
**WHEGHHHHHH\***

B/Brisbane/60/2008 stem construct

MKAIIVLLMVVTSNADRICTGITSSNSPHVVKTATQGEVNVTVGIPLG**SSGL**KLANGTKYRP**QRETR**RGFFGAIAGFLEGGWEGMIA  
 GWHGYTSHGAHGVAVAADLKSTQEAINKITKNLNSLSELE**GSGGSGTDLA**ELAVLLSNEGIINSEDEHLLALERKLLKMLGPSAV  
 EIGNGCFETKHKCNQTCLDRIAAGTFDAGEFSLPTFDSLNI**TGSGYIPEAPRDGQAYVRKDGEWLLSTFLGSLNDIFEAQKIE**  
**WHEGHHHHHH\***

**B**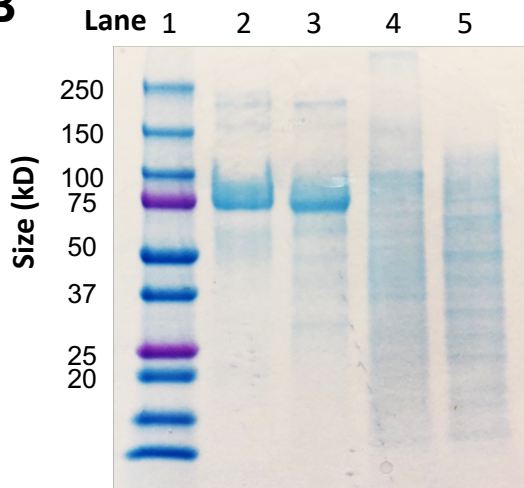**C**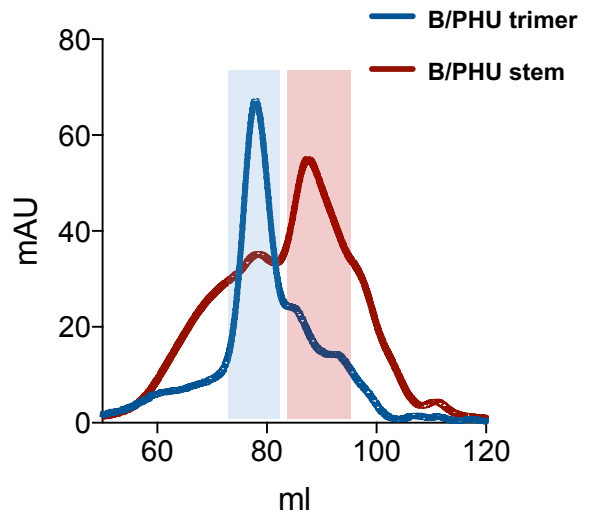**D**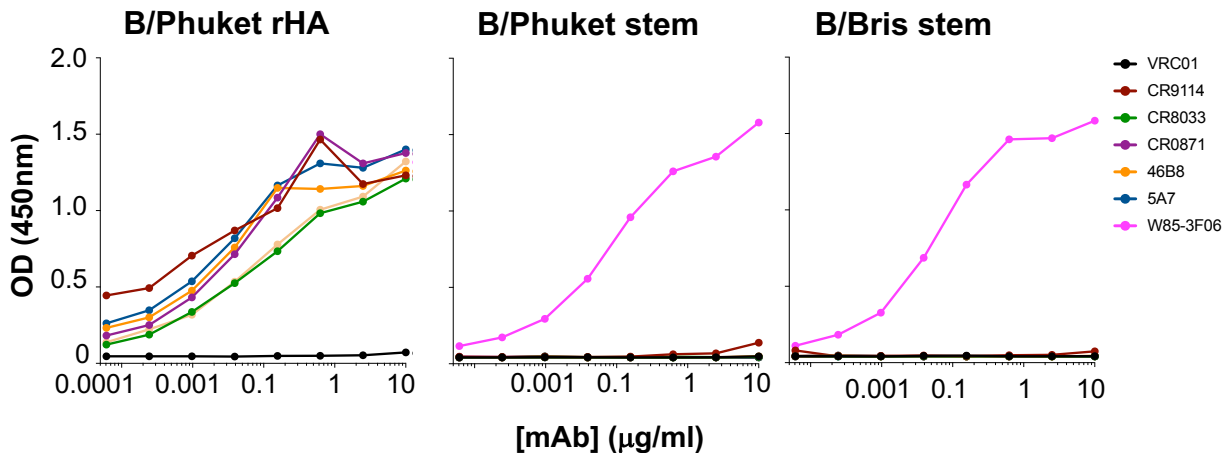

### Supplementary Figure 10 – Design and expression of IBV HA stem proteins

(A) Stabilised IBV stem constructs encompassing relevant sections of the IBV HA ectodomain interspersed with linkers (purple) then C-terminally fused to the trimeric foldon of T4 fibrin (red), AviTag (green) and hexa-histidine affinity tag (blue). (B) SDS-PAGE of expressed recombinant IBV proteins. Lane 1 – marker, lane 2 – 5µg B/Brisbane/60/2008 HA trimer, lane 3 - 5µg B/Phuket/3073/2013 HA trimer, lane 4 - 5µg B/Brisbane/60/2008 HA stem, lane 5 - 5µg B/Phuket/3073/2013 HA stem. (C) Gel filtration trace of B/Phuket/3073/2013 HA trimer and B/Phuket/3073/2013 HA stem proteins. (D) Binding of known IBV-specific mAbs to stabilised IBV stem proteins and a rHA control was examined by ELISA.

| <b>mAb</b> | <b>Virus</b>       | <b>Mutant</b>                | <b>IC50</b> |
|------------|--------------------|------------------------------|-------------|
| K77-1G12   | B/Phuket/3073/2013 | WT                           | <0.05mg/ml  |
|            |                    | G156E, T214I                 | >100mg/ml   |
| W85-1B01   | B/Phuket/3073/2013 | WT                           | <0.05mg/ml  |
|            |                    | G156R, D212N                 | >100mg/ml   |
| R95-1D05   | B/Phuket/3073/2013 | WT                           | 0.095mg/ml  |
|            |                    | G156R                        | 2.47mg/ml   |
| K77-2E02   | B/Brisbane/60/2008 | WT                           | 0.275mg/ml  |
|            |                    | $\Delta$ K177-D179,<br>T214P | >100mg/ml   |
|            |                    | T214P                        | >100mg/ml   |
| CR8033     | B/Phuket/3073/2013 | WT                           | <0.05mg/ml  |
|            | B/Brisbane/60/2008 | WT                           | 44mg/ml     |
|            |                    | $\Delta$ K177-D179,<br>T214P | >100mg/ml   |

**Supplementary Figure 11 – Neutralisation activity of human mAbs against wild-type (WT) and escape mutant IBV**

The inhibitory concentration of mAb sufficient to prevent infection of 50% of MDCK tissue culture wells (IC50) was determined for monoclonal wild-type and escape mutant viruses recovered after plaque purification.

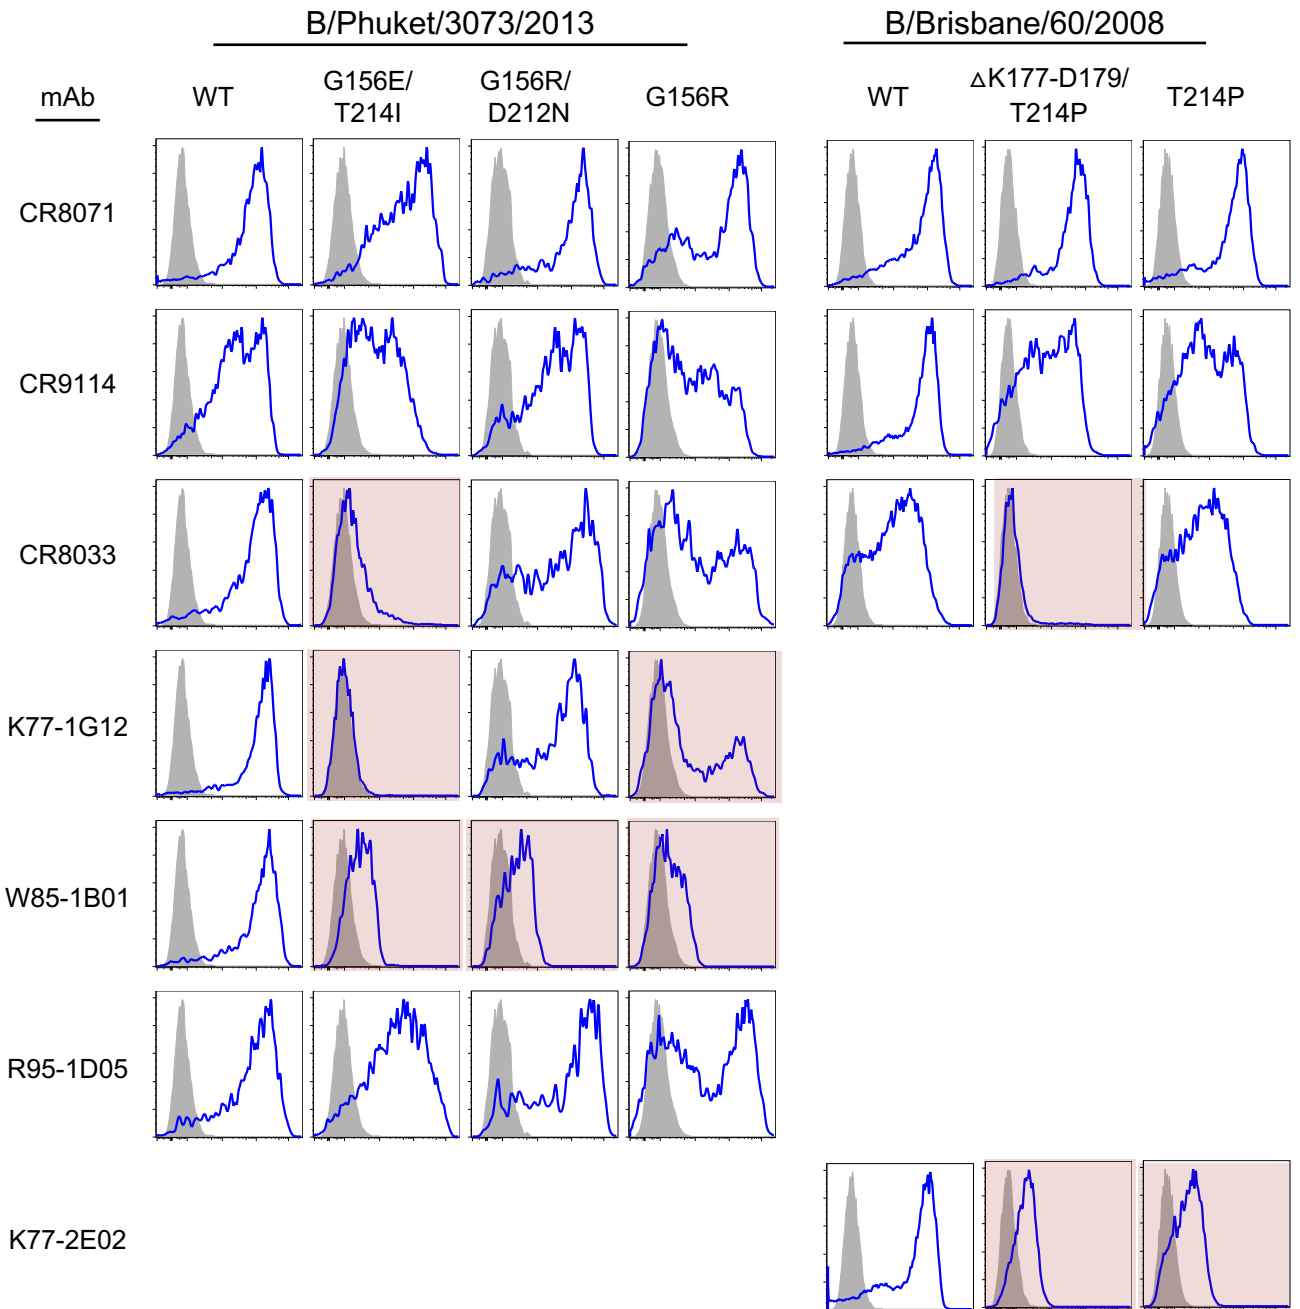

**Supplementary Figure 12 – Binding of mAbs to surface HA following infection of MDCK cells**

MDCK cells were infected *in vitro* with wild-type (WT) or viruses with the indicated escape mutations. The binding of human mAbs to HA on the cell surface was assessed by flow cytometry 18 hours post-infection. A major loss of binding relative to wild-type virus is indicated in red shading.

### B/Brisbane/60/2008

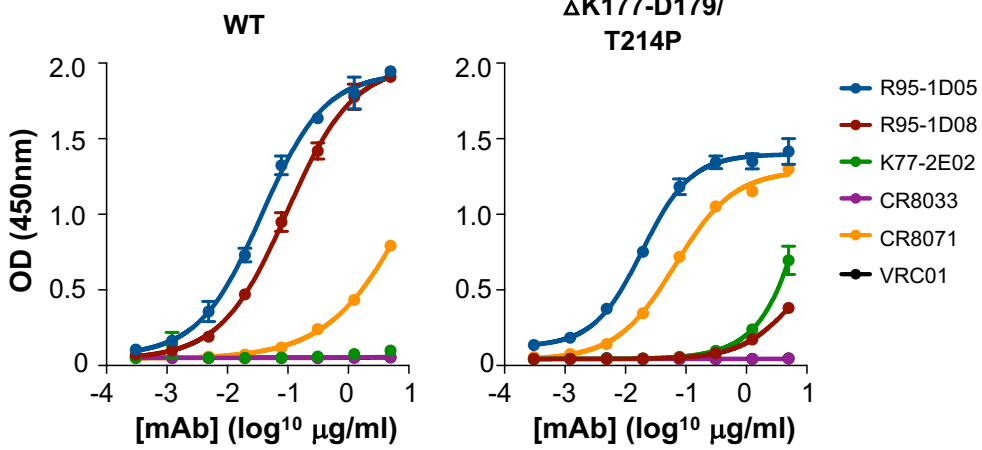

### B/Phuket/3073/2013

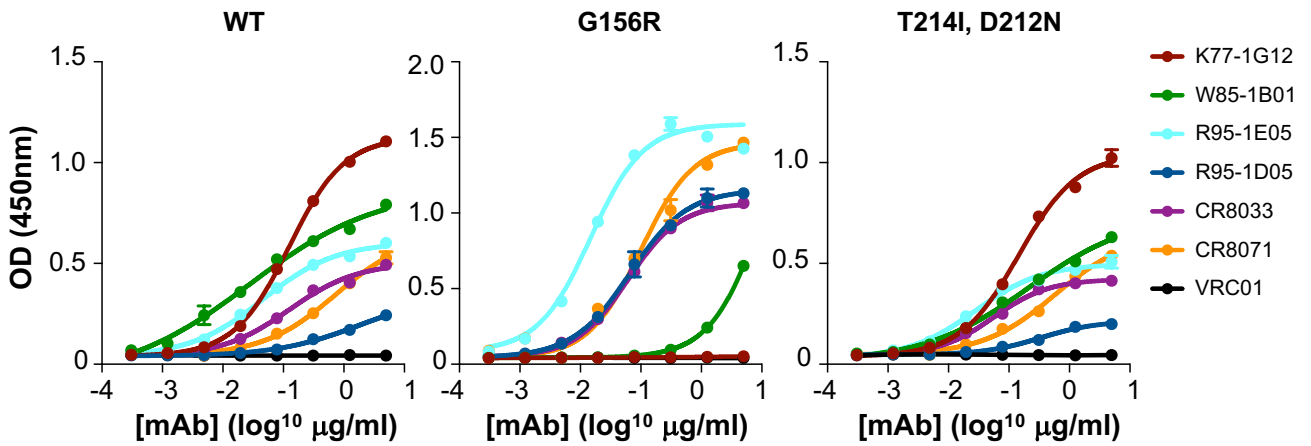

**Supplementary Figure 13 - Binding of mAbs to wild-type and mutant HA by ELISA**  
Recombinant HA ectodomains were expressed using sequences from wild-type (WT) or viruses with the indicated escape mutations. The binding of human mAbs to HA was assessed by ELISA.

**A**

| Cohort                                                     |                                | 2015 IIV3    | 2016 IIV4    |
|------------------------------------------------------------|--------------------------------|--------------|--------------|
| Age – mean (range)                                         |                                | 40.3 (22-55) | 34.8 (21-53) |
| Gender – #male (%)                                         |                                | 13 (43.3%)   | 10 (50%)     |
| Influenza vaccine history in prior 5 years (self-reported) | <i>Unknown / not disclosed</i> | 2 (6.7%)     | 3 (15%)      |
|                                                            | 0                              | 2 (6.7%)     | 2 (10%)      |
|                                                            | 1                              | 6 (20%)      | 5 (25%)      |
|                                                            | 2                              | 4 (13.3%)    | 1 (5%)       |
|                                                            | >3                             | 16 (53.5%)   | 9 (45%)      |

**B**

| Subject | Age | Gender | Influenza vaccine history in prior 5 years (self-reported) |
|---------|-----|--------|------------------------------------------------------------|
| K77     | 39  | M      | 3                                                          |
| W85     | 31  | F      | 1                                                          |
| R95     | 21  | F      | 0                                                          |

**Supplementary Figure 14 – Summary of clinical trial participant information**

(A) Summary of participant information from seasonal influenza vaccine immunisation trials in 2015 and 2016. (B) Details of participants used for B cell sorting and recovery of monoclonal antibodies.

B/Brisbane/60/2008

MKAIIVLLMVVTSNADRICTGITSSNSPHVVKATQGEVNVTVGIPLTTTPTKSHFANLKGTETRGKLCPKCLNCTDLDVALGRP  
KCTGKIP SARVSI LHEVRPVTS GCFPI MHDRTKIRQLPNLLRGYEHIRLSTHNVINAENAPGGPYKIGTSGSCPNI TNGNGFFAT  
MAWAVPKNDKNKTATNPLTIEVPICTEGEDQITVWGFHSDDETQMAKLYGDSKPKQFTSSANGVTTHYVSQIGGFPNQTEDGGL  
PQSGRIVVDYVMVQKSGKTGTITYQRGILLPQKVWCASGRSKVIKGSPLIIGEADCLHEKYGGLNKS KPYTGEHAKAIGNCPIWV  
KTPLKLANGTKYRPPAKLLKERGFFGAIAGFLEGGWEGMIAGWHGYTSHGAHGVAVAADLKSTQEAINKITKNLNSLSELEVKNL  
QLSGAMDELHNEIILELDEKVDDLADT ISSQIELAVLLSNEGI INSEDEHLLALERKLLKMLGPSAVE IGNCGFETKHKCNQTC  
LDRIAAGTFDAGEFSLPTFDSL NIT **GGYIPEAPRDGQAYVRKDGEWVLLSTFLGSLNDIFEAQKIEWHEGHHHHHH\***

B/Phuket/3073/2013

MKAIIVLLMVVTSNADRICTGITSSNSPHVVKATQGEVNVTVGIPLTTTPTKSYFANLKGTRTRGKLCPDCLNCTDLDVALGRP  
MCVGTTPSAKASILHEVRPVTS GCFPI MHDRTKIRQLPNLLRGYEHIRLSTQNVIDAEKAPGGPYRLGTSGSCP NATSKIGFFAT  
MAWAVPKNDKNYKNATNPLTVEVPICTEGEDQITVWGFHSDNKTQMSLYGDSNPQKFTSSANGVTTHYVSQIGDFPDQTEDGGLP  
QSGRIVVDYMMQKPKGTGTITYQRGVLLPQKVWCASGRSKVIKGSPLIIGEADCLHEEYGLNKS KPYTGKHAKAIGNCPIWV  
TPLKLANGTKYRPPAKLLKERGFFGAIAGFLEGGWEGMIAGWHGYTSHGAHGVAVAADLKSTQEAINKITKNLNSLSELEVKNLQ  
RLSGAMDELHNEIILELDEKVDDLADT ISSQIELAVLLSNEGI INSEDEHLLALERKLLKMLGPSAVDIGNGCFETKHKCNQTC  
DRIAAGTFNAGEFSLPTFDSL NIT **GGYIPEAPRDGQAYVRKDGEWVLLSTFLGSLNDIFEAQKIEWHEGHHHHHH\***

B/Malaysia/2506/04

MKAIIVLLMVVTSNADRICTGITSSNSPHVVKATQGEVNVTVGIPLTTTPTKSHFANLKGTETRGKLCPKCLNCTDLDVALGRP  
KCTGNIP SARVSI LHEVRPVTS GCFPI MHDRTKIRQLPNLLRGYEHIRLSTHNVINAENAPGGSYKIGTSGSCP NVTNGNGFFAT  
MAWAVPKNDNKNKTATNPLTIEVPICTEGEDQITVWGFHSDNEA QMAKLYGDSKPKQFTSSANGVTTHYVSQIGGFPNQTEDGGL  
PQSGRIVVDYVMVQKSGKTGTITYQRGILLPQKVWCASGRSKVIKGSPLIIGEADCLHEKYGGLNKS KPYTGEHAKAIGNCPIWV  
KTPLKLANGTKYRPPAKLLKERGFFGAIAGFLEGGWEGMIAGWHGYTSHGAHGVAVAADLKSTQEAINKITKNLNSLSELEVKNL  
QLSGAMDELHNEIILELDEKVDDLADT ISSQIELAVLLSNEGI INSEDEHLLALERKLLKMLGPSAVE IGNCGFETKHKCNQTC  
LDRIAAGTFDAGEFSLPTFDSL NIT **GGYIPEAPRDGQAYVRKDGEWVLLSTFLGSLNDIFEAQKIEWHEGHHHHHH\***

B/Florida/60/2008

MKAIIVLLMVVTSNADRICTGITSSNSPHVVKATQGEVNVTVGIPLTTTPTKSYFANLKGTRTRGKLCPDCLNCTDLDVALGRP  
MCVGTTPSAKASILHEV KPVTS GCFPI MHDRTKIRQLPNLLRGYENIRLSTQNVIDAEKAPGGPYRLGTSGSCP NATSKSGFFAT  
MAWAVPKNDNKNATNPLTVEVPICTEGEDQITVWGFHSDDKTQMKNYGDSNPQKFTSSANGVTTHYVSQIGSFPDQTEDGGLP  
QSGRIVVDYMMQKPKGTGTIVYQRGVLLPQKVWCASGRSKVIKGSPLIIGEADCLHEKYGGLNKS KPYTGEHAKAIGNCPIWV  
TPLKLANGTKYRPPAKLLKERGFFGAIAGFLEGGWEGMIAGWHGYTSHGAHGVAVAADLKSTQEAINKITKNLNSLSELEVKNLQ  
RLSGAMDELHNEIILELDEKVDDLADT ISSQIELAVLLSNEGI INSEDEHLLALERKLLKMLGPSAVE IGNCGFETKHKCNQTC  
DRIAAGTFNAGEFSLPTFDSL NIT **GGYIPEAPRDGQAYVRKDGEWVLLSTFLGSLNDIFEAQKIEWHEGHHHHHH\***

B/Victoria/2/1987

MKAIIVLLMVVTSNADRICTGITSSNSPHVVKATQGEVNVTVGIPLTTTPTKSHFANLKGTKTRGKLCPKCLNCTDLDVALARP  
KCMGTIPSAKASILHEV KPVTS GCFPI MHDRTKIRQLPNLLRGYEHIRLSTHNVINAETAPGGPYKVGTS GSCP NVTNGNGFFAT  
MAWAVPKNDNKNKTATNPLTVEVPICTEGEDQITVWGFHSDSETQMVLYGDSKPKQFTSSANGVTTHYVSQIGGFPNQAE DGLP  
PQSGRIVVDYVMVQKSGKTGTITYQRGILLPQKVWCASGRSKVIKGSPLIIGEADCLHEKYGGLNKS KPYTGEHAKAIGNCPIWV  
KTPLKLANGTKYRPPAKLLKERGFFGAIAGFLEGGWEGMIAGWHGYTSHGAHGVAVAADLKSTQEAINKITKNLNSLSELEVKNL  
QLSGAMDELHNEIILELDEKVDDLADT ISSQIELAVLLSNEGI INSEDEHLLALERKLLKMLGPSAVE IGNCGFETKHKCNQTC  
LDRIAAGTFNAGEFSLPTFDSL NIT **GGYIPEAPRDGQAYVRKDGEWVLLSTFLGSLNDIFEAQKIEWHEGHHHHHH\***

B/Yamagata/16/1988

MKAIIVLLMVVTSNADRICTGITSSNSPHVVKATQGEVNVTVGIPLTTTPTKSHFANLKGTKTRGKLCPNCLNCTDLDVALGRP  
KCMGTIPSAKASILHEVRPVTS GCFPI MHDRTKIRQLPNLLRGYENIRLSTHNVINAERAPGGPYRLGTSGSCP NVTSRNGFFAT  
MAWAVPRNDKNKTATNPLTVEVPICTKGEDQITVWGFHSDDKTQMKNYGDSNPQKFTSSANGVTTHYVSQIGDFPNQTEDGGLPQ  
SGRIVVDYVMVQKPKGTGTIVYQRGVLLPQKVWCASGRSKVIKGSPLIIGEADCLHEKYGGLNKS KPYTGEHAKAIGNCPIWVKT  
PLKLANGTKYRPPAKLLKERGFFGAIAGFLEGGWEGMIAGWHGYTSHGAHGVAVAADLKSTQEAINKITKNLNSLSELEVKNLQR  
LSGAMDELHNEIILELDEKVDDLADT ISSQIELAVLLSNEGI INSEDEHLLALERKLLKMLGPSAVDIGNGCFETKHKCNQTC  
DRIAAGTFNAGEFSLPTFDSL NIT **GGYIPEAPRDGQAYVRKDGEWVLLSTFLGSLNDIFEAQKIEWHEGHHHHHH\***

B/Lee/1940

MKAIIVLLMVVTSNADRICTGITSSNSPHVVKATQGEVNVTVGIPLTTTPTRSHFANLKGTRGKLCPNCFNCTDLDVALGRP  
KCMGNIPSAKASILHEV KPVTS GCFPI MHDRTKIRQLPNLLRGYENIRLSTSNVINAETAPGGPYKVGTS GSCP NVANRNGFFNT  
MAWVIPKNDNKNKTAINPVTEVPICTSEGEDQITVWGFHSDDKTQMERLYGDSNPQKFTSSANGVTTHYVSQIGGFPNQTEDEGLK  
QSGRIVVDYVMVQKPKGTGTIVYQRGILLPQKVWCASGRSKVIKGSPLIIGEADCLHEKYGGLNKS KPYTGEHAKAIGNCPIWV  
TPLKLANGTKYRPPAKLLKERGFFGAIAGFLEGGWEGMIAGWHGYTSHGAHGVAVAADLKSTQEAINKITKNLNSLSELEVKNLQ  
RLSGAMNGLHDEIILELDEKVDDLADT ISSQIELAVLLSNEGI INSEDEHLLALERKLLKMLGPSAVE IGNCGFETKHKCNQTC  
DRIAAGTFNAGDFSLPTFDSL NIT **GGYIPEAPRDGQAYVRKDGEWVLLSTFLGSLNDIFEAQKIEWHEGHHHHHH\***

## Supplementary Figure 15 - Recombinant HA probe sequences

The indicated IBV HA ectodomain was C-terminally fused to the trimeric foldon of T4 fibrinin (red), AviTag (green) and hexa-histidine affinity tag (blue).



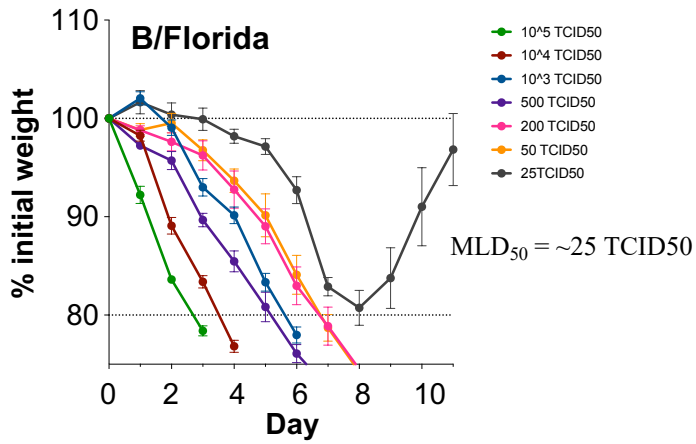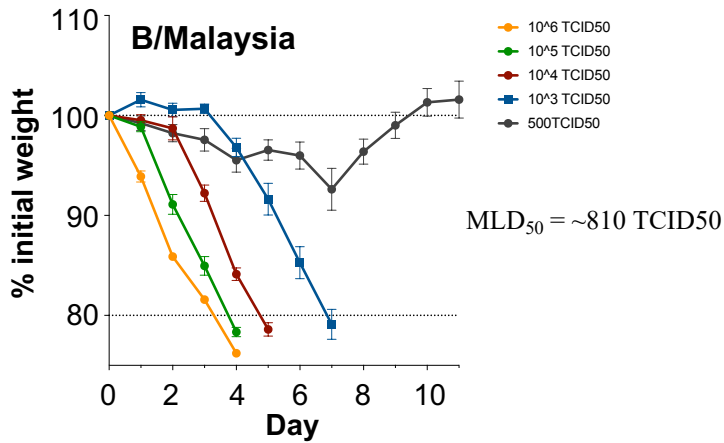

**Supplementary Figure 16 - Titration of mouse challenge stocks**

Weight loss in mice (N=5 per group) receiving increasing intranasal doses of B/Florida/4/2006 or B/Malaysia/2506/2004 challenge stocks. Data are mean and SEM.
